# Supplementary material
Source: PubMed Central journal article supplement (PMC6086168)
Supplement: tpmd170980.SD1.pdf [file tpmd170980.SD1.pdf]

SUPPLEMENTAL TABLE 1  
Mosquito pools analyzed in this study

| Pool No.* | Department | Locality/neighborhood   | Capture       | Date              | Specie                   | Gender | Amount | Engorged |
|-----------|------------|-------------------------|---------------|-------------------|--------------------------|--------|--------|----------|
| 1         | Rio Negro  | Fray Bentos city        | Manual        | May 2, 2006       | <i>Cx. pipiens</i>       | F      | 10     | Yes      |
| 2         | Colonia    | Colonia city            | Manual        | April 1, 2006     | <i>Cx. pipiens</i>       | M      | 7      | -        |
| 3         | Colonia    | Colonia city            | Manual        | April 1, 2006     | <i>Cx. pipiens</i>       | F      | 24     | No       |
| 4         | Montevideo | Buceo neighborhood      | Manual        | November 10, 2006 | <i>Ae. albifasciatus</i> | M      | 12     | -        |
| 5         | Montevideo | Buceo neighborhood      | Manual        | November 10, 2006 | <i>Ae. albifasciatus</i> | F      | 15     | No       |
| 6         | Colonia    | Colonia city            | Manual        | March 31, 2006    | <i>Cx. pipiens</i>       | F      | 2      | Yes      |
| 7         | Artigas    | 30°25'S, 56°28'W        | CDC model 512 | June 12, 2007     | <i>Cx. coronator</i>     | F      | 1      | ND       |
| 8         | Artigas    | 30°25'S, 56°28'W        | CDC model 512 | June 12, 2007     | <i>Uranotaenia</i> sp.   | F      | 1      | ND       |
| 9         | Artigas    | 30°25'S, 56°28'W        | CDC model 512 | June 12, 2007     | <i>Cx. bidens</i>        | F      | 1      | ND       |
| 10        | Artigas    | 30°25'S, 56°28'W        | CDC model 512 | June 12, 2007     | <i>A. squamipennis</i>   | F      | 1      | ND       |
| 11        | Artigas    | 30°25'S, 56°28'W        | CDC model 512 | June 12, 2007     | <i>Cx. bidens</i>        | F      | 1      | ND       |
| 12        | Canelones  | Atlántida city          | CDC model 512 | February 1, 2008  | <i>Cx. pipiens</i>       | F      | 3      | ND       |
| 13        | Canelones  | Atlántida city          | CDC model 512 | February 1, 2008  | <i>Cx. pipiens</i>       | F      | 1      | ND       |
| 14        | Canelones  | Atlántida city          | CDC model 512 | February 1, 2008  | <i>Cx. pipiens</i>       | M      | 4      | -        |
| 15        | Canelones  | Atlántida city          | CDC model 512 | February 1, 2008  | <i>Cx. pipiens</i>       | F      | 51     | ND       |
| 16        | Canelones  | Atlántida city          | CDC model 512 | February 1, 2008  | <i>Cx. pipiens</i>       | F      | 50     | ND       |
| 18        | Montevideo | Unión neighborhood      | Manual        | February 18, 2009 | <i>Cx. pipiens</i>       | M      | 50     | -        |
| 19        | Montevideo | Unión neighborhood      | Manual        | February 18, 2009 | <i>Cx. pipiens</i>       | M      | 50     | -        |
| 20        | Montevideo | Unión neighborhood      | Manual        | February 18, 2009 | <i>Cx. pipiens</i>       | M      | 28     | -        |
| 21        | Montevideo | Unión neighborhood      | Manual        | February 18, 2009 | <i>Cx. pipiens</i>       | F      | 50     | No       |
| 22        | Montevideo | Unión neighborhood      | Manual        | February 18, 2009 | <i>Cx. pipiens</i>       | F      | 22     | No       |
| 23        | Montevideo | Unión neighborhood      | Manual        | February 18, 2009 | <i>Cx. pipiens</i>       | F      | 14     | No       |
| 24        | Montevideo | Unión neighborhood      | Manual        | January 2, 2009   | <i>Cx. pipiens</i>       | M      | 17     | -        |
| 25        | Salto      | Salto city 09           | CDC model 512 | February 19, 2009 | <i>Cx. pipiens</i>       | F      | 1      | No       |
| 26        | Salto      | Salto city 03           | CDC model 512 | February 19, 2009 | <i>Psorophora</i> sp.    | F      | 1      | No       |
| 27        | Salto      | Salto city 03           | CDC model 512 | February 19, 2009 | <i>Cx. pipiens</i>       | F      | 2      | No       |
| 28        | Montevideo | Buceo neighborhood      | Manual        | February 19, 2009 | <i>Ae. albifasciatus</i> | F      | 6      | No       |
| 29        | Montevideo | Cuchilla Pereyra suburb | Manual        | March 24, 2009    | <i>Cx. pipiens</i>       | F      | 8      | No       |
| 30        | Montevideo | Cuchilla Pereyra suburb | Manual        | March 24, 2009    | <i>Cx. pipiens</i>       | M      | 4      | -        |
| 31        | Montevideo | Carrasco wetlands       | CDC model 512 | March 19, 2009    | <i>Aedes scapularis</i>  | F      | 1      | No       |
| 32        | Montevideo | Carrasco wetlands       | CDC model 512 | March 19, 2009    | <i>Ae. crinifer</i>      | F      | 1      | No       |
| 33        | Montevideo | Carrasco wetlands       | CDC model 512 | March 19, 2009    | <i>Culex</i> spp.        | F      | 9      | No       |
| 34        | Montevideo | Carrasco wetlands       | CDC model 512 | March 20, 2009    | <i>M. titillans</i>      | F      | 1      | No       |
| 35        | Montevideo | Carrasco wetlands       | CDC model 512 | March 21, 2009    | <i>Ae. crinifer</i>      | F      | 1      | No       |
| 36        | Montevideo | Carrasco wetlands       | CDC model 512 | March 22, 2009    | <i>Culex</i> sp.         | M      | 1      | -        |
| 37        | Montevideo | Carrasco wetlands       | CDC model 512 | March 23, 2009    | <i>Cx. pipiens</i>       | F      | 50     | No       |
| 38        | Rivera     | Rivera city 03          | CDC model 512 | April 19, 2009    | <i>Ae. fluviatilis</i>   | F      | 1      | No       |
| 39        | Rivera     | Rivera city 02          | Manual        | April 19, 2009    | <i>Cx. pipiens</i>       | F      | 2      | No       |
| 40        | Rivera     | Rivera city 03          | CDC model 512 | April 15, 2009    | <i>Culex</i> sp.         | F      | 1      | No       |
| 41        | Rivera     | Rivera city 02          | Manual        | April 15, 2009    | <i>Culex</i> spp.        | F      | 7      | No       |
| 42        | Rivera     | Rivera city 03          | CDC model 512 | April 16, 2009    | <i>Culex</i> spp.        | F      | 45     | No       |
| 43        | Rivera     | Rivera city 02          | Manual        | April 16, 2009    | <i>Cx. pipiens</i>       | F      | 4      | No       |
| 44        | Rivera     | Rivera city 01          | CDC model 512 | April 16, 2009    | <i>Culex</i> spp.        | F      | 2      | Yes      |
| 45        | Rivera     | Rivera city 01          | CDC model 512 | April 16, 2009    | <i>Culex</i> spp.        | M      | 8      | -        |
| 46        | Rivera     | Rivera city 01          | CDC model 512 | April 16, 2009    | <i>Cx. pipiens</i>       | F      | 14     | No       |
| 47        | Canelones  | Los Titanes suburb      | CDC model 512 | April 30, 2009    | <i>Cx. pipiens</i>       | F      | 1      | Yes      |
| 48        | Canelones  | Los Titanes suburb      | CDC model 512 | April 30, 2009    | <i>Cx. pipiens</i>       | F      | 2      | No       |
| 49        | Canelones  | Los Titanes suburb      | CDC model 512 | April 30, 2009    | <i>Cx. bidens</i>        | F      | 3      | No       |
| 50        | Montevideo | Belvedere neighborhood  | CDC model 512 | May 5, 2009       | <i>Cx. dolosus</i>       | F      | 1      | No       |
| 51        | Montevideo | Belvedere neighborhood  | CDC model 512 | May 5, 2009       | <i>Culex</i> spp.        | F      | 7      | No       |
| 52        | Montevideo | Belvedere neighborhood  | CDC model 512 | May 5, 2009       | <i>Cx. pipiens</i>       | F      | 50     | No       |
| 53        | Montevideo | Belvedere neighborhood  | CDC model 512 | May 5, 2009       | <i>Cx. pipiens</i>       | F      | 1      | Yes      |
| 54        | Canelones  | Los Titanes suburb      | CDC model 512 | April 30, 2009    | <i>Cx. pipiens</i>       | F      | 2      | No       |
| 55        | Montevideo | Belvedere neighborhood  | CDC model 512 | May 4, 2009       | <i>Cx. pipiens</i>       | F      | 50     | No       |
| 56        | Montevideo | Belvedere neighborhood  | CDC model 512 | May 4, 2009       | <i>Culex</i> spp.        | F      | 4      | No       |
| 57        | Montevideo | Belvedere neighborhood  | CDC model 512 | May 4, 2009       | <i>Culex</i> spp.        | F      | 5      | Yes      |
| 58        | Montevideo | Belvedere neighborhood  | CDC model 512 | May 4, 2009       | <i>Cx. pipiens</i>       | F      | 45     | No       |
| 59        | Salto      | Salto city 05           | CDC model 512 | November 23, 2009 | <i>Cx. apicinus</i>      | F      | 1      | No       |
| 60        | Salto      | Salto city 02           | CDC model 512 | November 23, 2009 | <i>Cx. pipiens</i>       | M      | 2      | -        |
| 61        | Salto      | Salto city 02           | CDC model 512 | November 23, 2009 | <i>Cx. pipiens</i>       | F      | 3      | Yes      |
| 62        | Salto      | Salto city 02           | CDC model 512 | November 23, 2009 | <i>Cx. pipiens</i>       | F      | 11     | No       |
| 63        | Salto      | Salto city 02           | CDC model 512 | November 24, 2009 | <i>P. ciliata</i>        | F      | 2      | No       |
| 64        | Salto      | Salto city 08           | CDC model 512 | November 24, 2009 | <i>Cx. pipiens</i>       | F      | 7      | No       |
| 65        | Salto      | Salto city 08           | CDC model 512 | November 24, 2009 | <i>Cx. pipiens</i>       | F      | 2      | No       |
| 66        | Salto      | Salto city 09           | CDC model 512 | November 24, 2009 | <i>Cx. pipiens</i>       | F      | 1      | No       |
| 67        | Salto      | Salto city 07           | CDC model 512 | November 25, 2009 | <i>Ae. scapularis</i>    | F      | 4      | No       |
| 68        | Salto      | Salto city 07           | CDC model 512 | November 25, 2009 | <i>Ae. albifasciatus</i> | F      | 1      | No       |
| 69        | Salto      | Salto city 07           | CDC model 512 | November 25, 2009 | <i>Cx. pipiens</i>       | F      | 19     | No       |
| 70        | Salto      | Salto city 02           | CDC model 512 | November 25, 2009 | <i>Cx. pipiens</i>       | F      | 5      | Yes      |

(continued)

SUPPLEMENTAL TABLE 1

Continued

| Pool No.* | Department | Locality/neighborhood     | Capture       | Date              | Specie                   | Gender | Amount | Engorged |
|-----------|------------|---------------------------|---------------|-------------------|--------------------------|--------|--------|----------|
| 71        | Salto      | Salto city 02             | CDC model 512 | November 25, 2009 | <i>Ae. albifasciatus</i> | F      | 3      | No       |
| 72        | Salto      | Salto city 02             | CDC model 512 | November 25, 2009 | <i>Cx. pipiens</i>       | M      | 5      | -        |
| 73        | Salto      | Salto city 02             | CDC model 512 | November 25, 2009 | <i>Cx. pipiens</i>       | F      | 28     | No       |
| 74        | Salto      | Salto city 02             | CDC model 512 | November 25, 2009 | <i>Cx. pipiens</i>       | F      | 45     | No       |
| 75        | Salto      | Salto city 02             | CDC model 512 | November 25, 2009 | <i>Cx. pipiens</i>       | M      | 1      | -        |
| 76        | Salto      | Salto city 02             | CDC model 512 | November 26, 2009 | <i>Cx. pipiens</i>       | F      | 1      | Yes      |
| 77        | Salto      | Salto city 02             | CDC model 512 | November 26, 2009 | <i>Cx. pipiens</i>       | F      | 12     | No       |
| 78        | Salto      | Salto city 04             | CDC model 512 | November 26, 2009 | <i>Cx. coronator</i>     | F      | 1      | No       |
| 79        | Salto      | Salto city 04             | CDC model 512 | November 26, 2009 | <i>Psorophora sp.</i>    | F      | 1      | No       |
| 80        | Salto      | Salto city 02             | CDC model 512 | November 26, 2009 | <i>Cx. pipiens</i>       | F      | 6      | No       |
| 81        | Salto      | Salto city 02             | CDC model 512 | November 26, 2009 | <i>Ae. albifasciatus</i> | F      | 3      | No       |
| 82        | Salto      | Salto city 02             | CDC model 512 | November 26, 2009 | <i>Ae. scapularis</i>    | F      | 1      | No       |
| 83        | Salto      | Salto city 11             | CDC model 512 | November 26, 2009 | <i>Cx. pipiens</i>       | M      | 1      | -        |
| 84        | Salto      | Salto city 11             | CDC model 512 | November 26, 2009 | <i>Cx. pipiens</i>       | F      | 50     | No       |
| 85        | Salto      | Salto city 11             | CDC model 512 | November 26, 2009 | <i>Cx. pipiens</i>       | F      | 58     | No       |
| 86        | Salto      | Salto city 06             | Manual        | November 26, 2009 | <i>Cx. pipiens</i>       | F      | 1      | Yes      |
| 87        | Paysandú   | Paysandú city 01          | CDC model 512 | December 3, 2009  | <i>Cx. pipiens</i>       | F      | 44     | No       |
| 88        | Paysandú   | Paysandú city 01          | CDC model 512 | December 3, 2009  | <i>Cx. pipiens</i>       | M      | 1      | -        |
| 89        | Paysandú   | Paysandú city 01          | CDC model 512 | December 3, 2009  | <i>Ae. albifasciatus</i> | F      | 3      | No       |
| 90        | Paysandú   | Paysandú city 01          | CDC model 512 | December 3, 2009  | <i>Cx. pipiens</i>       | M      | 1      | No       |
| 91        | Paysandú   | Paysandú city 01          | CDC model 512 | December 3, 2009  | <i>Cx. pipiens</i>       | F      | 39     | No       |
| 92        | Paysandú   | Paysandú city 01          | CDC model 512 | December 4, 2009  | <i>Cx. pipiens</i>       | F      | 50     | No       |
| 93        | Paysandú   | Paysandú city 01          | CDC model 512 | December 4, 2009  | <i>Cx. pipiens</i>       | F      | 50     | No       |
| 94        | Paysandú   | Paysandú city 01          | CDC model 512 | December 4, 2009  | <i>Cx. pipiens</i>       | F      | 50     | No       |
| 95        | Paysandú   | Paysandú city 01          | CDC model 512 | December 4, 2009  | <i>Cx. pipiens</i>       | F      | 24     | No       |
| 96        | Paysandú   | Paysandú city 01          | Manual        | December 4, 2009  | <i>Cx. pipiens</i>       | F      | 2      | No       |
| 97        | Paysandú   | Paysandú city 02          | CDC model 512 | December 5, 2009  | <i>Cx. pipiens</i>       | F      | 2      | No       |
| 98        | Paysandú   | Paysandú city 02          | CDC model 512 | December 5, 2009  | <i>Cx. pipiens</i>       | F      | 1      | Yes      |
| 99        | Paysandú   | Paysandú city 01          | CDC model 512 | December 6, 2009  | <i>Cx. pipiens</i>       | M      | 2      | -        |
| 100       | Paysandú   | Paysandú city 01          | CDC model 512 | December 6, 2009  | <i>Ae. albifasciatus</i> | F      | 1      | Yes      |
| 101       | Paysandú   | Paysandú city 01          | CDC model 512 | December 6, 2009  | <i>Cx. pipiens</i>       | M      | 1      | -        |
| 102       | Paysandú   | Paysandú city 01          | CDC model 512 | December 6, 2009  | <i>Cx. pipiens</i>       | F      | 2      | No       |
| 103       | Paysandú   | Paysandú city 01          | CDC model 512 | December 6, 2009  | <i>Cx. pipiens</i>       | F      | 2      | Yes      |
| 104       | Paysandú   | Paysandú city 01          | Manual        | December 6, 2009  | <i>Cx. pipiens</i>       | M      | 2      | -        |
| 105       | Paysandú   | Paysandú city 01          | Manual        | December 6, 2009  | <i>Cx. pipiens</i>       | F      | 5      | No       |
| 106       | Paysandú   | Paysandú city 01          | Manual        | December 6, 2009  | <i>Cx. pipiens</i>       | F      | 4      | Yes      |
| 107       | Paysandú   | Paysandú city 01          | Manual        | December 6, 2009  | <i>Ae. albifasciatus</i> | F      | 3      | No       |
| 108       | Paysandú   | Paysandú city 01          | Manual        | December 6, 2009  | <i>Ae. albifasciatus</i> | F      | 3      | Yes      |
| 109       | Paysandú   | Paysandú city 03          | CDC model 512 | December 6, 2009  | <i>Cx. pipiens</i>       | F      | 40     | No       |
| 110       | Paysandú   | Paysandú city 03          | CDC model 512 | December 6, 2009  | <i>Cx. pipiens</i>       | F      | 33     | No       |
| 111       | Canelones  | Atlántida city            | CDC model 512 | December 20, 2009 | <i>Cx. pipiens</i>       | F      | 36     | No       |
| 112       | Montevideo | Belvedere neighborhood    | CDC model 512 | December 18, 2009 | <i>Cx. pipiens</i>       | F      | 38     | No       |
| 113       | Montevideo | Belvedere neighborhood    | CDC model 512 | December 18, 2009 | <i>Cx. pipiens</i>       | F      | 5      | Yes      |
| 114       | Canelones  | Atlántida city            | CDC model 512 | March 9, 2010     | <i>Cx. pipiens</i>       | F      | 36     | No       |
| 115       | Canelones  | Atlántida city            | CDC model 512 | March 9, 2010     | <i>Cx. pipiens</i>       | F      | 1      | Yes      |
| 116       | Canelones  | Atlántida city            | CDC model 512 | March 9, 2010     | <i>Ae. albifasciatus</i> | F      | 1      | No       |
| 117       | Canelones  | Atlántida city            | CDC model 512 | March 10, 2010    | <i>Cx. pipiens</i>       | F      | 42     | No       |
| 118       | Canelones  | Atlántida city            | CDC model 512 | March 10, 2010    | <i>Cx. pipiens</i>       | M      | 1      | -        |
| 119       | Canelones  | Atlántida city            | CDC model 512 | March 10, 2010    | <i>Ae. albifasciatus</i> | F      | 1      | No       |
| 120       | Montevideo | Cerrito neighborhood      | Manual        | March 13, 2010    | <i>Cx. pipiens</i>       | F      | 4      | No       |
| 121       | Montevideo | Cerrito neighborhood      | Manual        | March 13, 2010    | <i>Ae. albifasciatus</i> | F      | 1      | No       |
| 122       | Montevideo | Cerrito neighborhood      | Manual        | March 13, 2010    | <i>Cx. pipiens</i>       | M      | 2      | -        |
| 123       | Montevideo | Cerrito neighborhood      | Manual        | March 19, 2010    | <i>Culex spp.</i>        | F      | 6      | No       |
| 124       | Montevideo | Villa García neighborhood | CDC model 512 | March 24, 2010    | <i>Cx. pipiens</i>       | F      | 48     | No       |
| 125       | Montevideo | Villa García neighborhood | CDC model 512 | March 24, 2010    | <i>Cx. pipiens</i>       | F      | 20     | No       |
| 126       | Montevideo | Villa García neighborhood | CDC model 512 | March 24, 2010    | <i>Cx. pipiens</i>       | F      | 1      | Yes      |
| 127       | Montevideo | Villa García neighborhood | CDC model 512 | March 24, 2010    | <i>Culex spp.</i>        | F      | 6      | No       |
| 128       | Montevideo | Villa García neighborhood | CDC model 512 | March 24, 2010    | <i>Cx. pipiens</i>       | F      | 13     | No       |
| 129       | Montevideo | Villa García neighborhood | CDC model 512 | March 24, 2010    | <i>Cx. pipiens</i>       | F      | 15     | No       |
| 130       | Montevideo | Villa García neighborhood | CDC model 512 | March 24, 2010    | <i>Cx. pipiens</i>       | F      | 1      | Yes      |
| 131       | Montevideo | Villa García neighborhood | CDC model 512 | March 24, 2010    | <i>Cx. pipiens</i>       | F      | 17     | No       |
| 132       | Montevideo | Villa García neighborhood | CDC model 512 | March 24, 2010    | <i>Ae. albifasciatus</i> | F      | 6      | No       |
| 133       | Montevideo | Villa García neighborhood | CDC model 512 | March 24, 2010    | <i>Ae. albifasciatus</i> | F      | 10     | No       |
| 134       | Montevideo | Villa García neighborhood | CDC model 512 | March 24, 2010    | <i>Cx. pipiens</i>       | F      | 26     | No       |
| 135       | Montevideo | Villa García neighborhood | CDC model 512 | March 24, 2010    | <i>Culex spp.</i>        | F      | 5      | No       |
| 136       | Montevideo | Villa García neighborhood | CDC model 512 | March 24, 2010    | <i>Ae. albifasciatus</i> | F      | 16     | No       |
| 137       | Montevideo | Villa García neighborhood | CDC model 512 | March 24, 2010    | <i>Culex spp.</i>        | F      | 2      | No       |
| 138       | Montevideo | Villa García neighborhood | CDC model 512 | March 24, 2010    | <i>Cx. pipiens</i>       | F      | 25     | No       |
| 139       | Montevideo | Belvedere neighborhood    | CDC model 512 | March 25, 2010    | <i>Cx. pipiens</i>       | F      | 8      | No       |

(continued)

SUPPLEMENTAL TABLE 1

Continued

| Pool No.* | Department | Locality/neighborhood  | Capture       | Date             | Specie                   | Gender | Amount | Engorged |
|-----------|------------|------------------------|---------------|------------------|--------------------------|--------|--------|----------|
| 140       | Montevideo | Belvedere neighborhood | CDC model 512 | March 25, 2010   | <i>Ae. albifasciatus</i> | F      | 37     | No       |
| 141       | Montevideo | Belvedere neighborhood | CDC model 512 | March 25, 2010   | <i>Ae. albifasciatus</i> | F      | 3      | Yes      |
| 142       | Montevideo | Belvedere neighborhood | CDC model 512 | March 25, 2010   | <i>Cx. pipiens</i>       | F      | 11     | No       |
| 143       | Montevideo | Belvedere neighborhood | CDC model 512 | March 25, 2010   | <i>Ae. albifasciatus</i> | F      | 27     | No       |
| 144       | Montevideo | Belvedere neighborhood | CDC model 512 | March 25, 2010   | <i>Cx. pipiens</i>       | F      | 1      | Yes      |
| 145       | Montevideo | Belvedere neighborhood | CDC model 512 | March 25, 2010   | <i>Ae. albifasciatus</i> | F      | 3      | Yes      |
| 146       | Montevideo | Belvedere neighborhood | CDC model 512 | March 25, 2010   | <i>Cx. pipiens</i>       | F      | 24     | No       |
| 147       | Montevideo | Belvedere neighborhood | CDC model 512 | March 25, 2010   | <i>Ae. albifasciatus</i> | F      | 37     | No       |
| 148       | Artigas    | Artigas city 02        | CDC model 512 | May 13, 2010     | <i>Cx. pipiens</i>       | F      | 3      | No       |
| 149       | Artigas    | Artigas city 02        | CDC model 512 | May 13, 2010     | <i>Cx. pipiens</i>       | F      | 1      | Yes      |
| 150       | Artigas    | Artigas city 02        | CDC model 512 | May 13, 2010     | <i>Culex spp.</i>        | F      | 26     | No       |
| 151       | Artigas    | Artigas city 02        | CDC model 512 | May 13, 2010     | <i>Cx. pipiens</i>       | F      | 2      | Yes      |
| 152       | Artigas    | Artigas city 02        | CDC model 512 | May 13, 2010     | <i>Culex spp.</i>        | F      | 10     | No       |
| 153       | Artigas    | Artigas city 02        | CDC model 512 | May 13, 2010     | <i>Cx. pipiens</i>       | F      | 3      | Yes      |
| 154       | Artigas    | Artigas city 02        | CDC model 512 | May 13, 2010     | <i>Cx. pipiens</i>       | F      | 17     | No       |
| 155       | Artigas    | Artigas city 02        | CDC model 512 | May 13, 2010     | <i>Cx. pipiens</i>       | F      | 13     | No       |
| 156       | Artigas    | Artigas city 01        | CDC model 512 | May 13, 2010     | <i>Ae. albifasciatus</i> | F      | 2      | No       |
| 157       | Artigas    | Artigas city 01        | CDC model 512 | May 13, 2010     | <i>Culex spp.</i>        | F      | 16     | No       |
| 158       | Artigas    | Artigas city 02        | CDC model 512 | May 13, 2010     | <i>Cx. pipiens</i>       | F      | 2      | Yes      |
| 159       | Artigas    | Artigas city 02        | CDC model 512 | May 13, 2010     | <i>Culex spp.</i>        | F      | 14     | No       |
| 160       | Artigas    | Artigas city 03        | CDC model 512 | May 14, 2010     | <i>Cx. pipiens</i>       | F      | 15     | No       |
| 161       | Artigas    | Artigas city 01        | CDC model 512 | May 14, 2010     | <i>Cx. pipiens</i>       | F      | 6      | No       |
| 162       | Artigas    | Artigas city 02        | CDC model 512 | May 14, 2010     | <i>Culex spp.</i>        | F      | 9      | No       |
| 163       | Artigas    | Artigas city 02        | CDC model 512 | May 14, 2010     | <i>Culex spp.</i>        | F      | 1      | Yes      |
| 164       | Artigas    | Artigas city 02        | CDC model 512 | May 15, 2010     | <i>Cx. pipiens</i>       | F      | 1      | Yes      |
| 165       | Artigas    | Artigas city 02        | CDC model 512 | May 15, 2010     | <i>Ae. albifasciatus</i> | F      | 2      | No       |
| 166       | Artigas    | Artigas city 02        | CDC model 512 | May 15, 2010     | <i>Cx. pipiens</i>       | F      | 29     | No       |
| 167       | Artigas    | Artigas city 02        | CDC model 512 | May 15, 2010     | <i>Culex spp.</i>        | F      | 12     | No       |
| 168       | Artigas    | Artigas city 02        | CDC model 512 | May 15, 2010     | <i>Cx. pipiens</i>       | F      | 24     | No       |
| 169       | Artigas    | Artigas city 02        | CDC model 512 | May 15, 2010     | <i>Culex spp.</i>        | F      | 12     | No       |
| 170       | Artigas    | Artigas city 02        | CDC model 512 | May 15, 2010     | <i>Cx. pipiens</i>       | F      | 27     | No       |
| 171       | Artigas    | Artigas city 02        | CDC model 512 | May 15, 2010     | <i>Cx. pipiens</i>       | F      | 12     | No       |
| 172       | Artigas    | Artigas city 02        | CDC model 512 | May 15, 2010     | <i>Ae. albifasciatus</i> | F      | 1      | No       |
| 173       | Artigas    | Artigas city 02        | CDC model 512 | May 15, 2010     | <i>Cx. pipiens</i>       | F      | 1      | Yes      |
| 174       | Artigas    | Artigas city 02        | CDC model 512 | May 15, 2010     | <i>Cx. pipiens</i>       | F      | 12     | No       |
| 175       | Artigas    | Artigas city 02        | CDC model 512 | May 15, 2010     | <i>Culex spp.</i>        | F      | 6      | No       |
| 176       | Artigas    | Artigas city 02        | CDC model 512 | May 15, 2010     | <i>Cx. pipiens</i>       | F      | 1      | Yes      |
| 177       | Artigas    | Artigas city 02        | CDC model 512 | May 15, 2010     | <i>Cx. pipiens</i>       | F      | 11     | No       |
| 178       | Artigas    | Artigas city 02        | CDC model 512 | May 15, 2010     | <i>Cx. pipiens</i>       | F      | 3      | Yes      |
| 179       | Artigas    | Artigas city 02        | CDC model 512 | May 15, 2010     | <i>Cx. pipiens</i>       | F      | 20     | No       |
| 180       | Artigas    | Artigas city 02        | CDC model 512 | May 15, 2010     | <i>Culex spp.</i>        | F      | 12     | No       |
| 181       | Artigas    | Artigas city 04        | CDC model 512 | May 15, 2010     | <i>Culex spp.</i>        | F      | 24     | No       |
| 182       | Artigas    | Artigas city 04        | CDC model 512 | May 15, 2010     | <i>Culex spp.</i>        | F      | 20     | No       |
| 183       | Canelones  | Los Titanes suburb     | CDC model 512 | May 17, 2010     | <i>Culex spp.</i>        | F      | 3      | No       |
| 184       | Canelones  | Los Titanes suburb     | CDC model 512 | May 17, 2010     | <i>Culex spp.</i>        | F      | 3      | No       |
| 185       | Canelones  | Los Titanes suburb     | CDC model 512 | May 17, 2010     | <i>Aedes spp.</i>        | F      | 17     | No       |
| 186       | Canelones  | Los Titanes suburb     | CDC model 512 | May 17, 2010     | <i>Aedes spp.</i>        | F      | 1      | Yes      |
| 187       | Canelones  | Los Titanes suburb     | CDC model 512 | May 17, 2010     | <i>Aedes spp.</i>        | F      | 20     | No       |
| 188       | Salto      | Salto city 10          | CDC model 512 | December 6, 2010 | <i>Culex spp.</i>        | F      | 3      | No       |
| 189       | Salto      | Salto city 10          | CDC model 512 | December 6, 2010 | <i>Cx. pipiens</i>       | F      | 8      | No       |
| 190       | Salto      | Salto city 02          | CDC model 512 | December 7, 2010 | <i>Cx. pipiens</i>       | F      | 18     | No       |
| 191       | Salto      | Salto city 02          | CDC model 512 | December 7, 2010 | <i>Cx. pipiens</i>       | F      | 1      | Yes      |
| 192       | Salto      | Salto city 02          | CDC model 712 | December 7, 2010 | <i>Cx. pipiens</i>       | F      | 10     | Yes      |
| 193       | Salto      | Salto city 02          | CDC model 512 | December 7, 2010 | <i>Cx. pipiens</i>       | F      | 30     | No       |
| 194       | Salto      | Salto city 02          | CDC model 512 | December 7, 2010 | <i>Cx. pipiens</i>       | F      | 39     | No       |
| 195       | Salto      | Salto city 02          | CDC model 512 | December 7, 2010 | <i>Cx. pipiens</i>       | F      | 35     | No       |
| 196       | Salto      | Salto city 02          | CDC model 512 | December 7, 2010 | <i>Culex spp.</i>        | F      | 10     | No       |
| 197       | Salto      | Salto city 02          | CDC model 512 | December 7, 2010 | <i>Cx. pipiens</i>       | F      | 13     | Yes      |
| 198       | Salto      | Salto city 02          | CDC model 512 | December 7, 2010 | <i>Cx. pipiens</i>       | F      | 57     | No       |
| 199       | Salto      | Salto city 02          | CDC model 512 | December 7, 2010 | <i>Cx. pipiens</i>       | F      | 12     | No       |
| 200       | Salto      | Salto city 05          | CDC model 512 | December 6, 2010 | <i>Cx. pipiens</i>       | F      | 3      | Yes      |
| 201       | Salto      | Salto city 05          | CDC model 512 | December 6, 2010 | <i>Cx. pipiens</i>       | F      | 22     | No       |
| 202       | Salto      | Salto city 05          | CDC model 512 | December 6, 2010 | <i>Cx. pipiens</i>       | F      | 23     | No       |
| 203       | Salto      | Salto city 05          | CDC model 512 | December 6, 2010 | <i>Cx. pipiens</i>       | F      | 16     | No       |
| 204       | Salto      | Salto city 05          | CDC model 512 | December 6, 2010 | <i>Cx. pipiens</i>       | F      | 25     | No       |
| 205       | Salto      | Salto city 04          | CDC model 712 | December 6, 2010 | <i>Cx. pipiens</i>       | M      | 3      | No       |
| 206       | Salto      | Salto city 04          | CDC model 712 | December 6, 2010 | <i>Cx. pipiens</i>       | M      | 17     | No       |
| 207       | Salto      | Salto city 04          | CDC model 712 | December 6, 2010 | <i>Cx. pipiens</i>       | F      | 10     | No       |
| 208       | Salto      | Salto city 04          | CDC model 712 | December 6, 2010 | <i>Culex spp.</i>        | F      | 18     | No       |

(continued)

SUPPLEMENTAL TABLE 1

Continued

| Pool No.* | Department | Locality/neighborhood      | Capture       | Date              | Specie                   | Gender | Amount | Engorged |
|-----------|------------|----------------------------|---------------|-------------------|--------------------------|--------|--------|----------|
| 209       | Salto      | Salto city 01              | CDC model 512 | December 10, 2010 | <i>Cx. pipiens</i>       | F      | 20     | No       |
| 210       | Salto      | Salto city 01              | CDC model 512 | December 10, 2010 | <i>Cx. pipiens</i>       | M      | 5      | -        |
| 211       | Salto      | Salto city 01              | CDC model 512 | December 10, 2010 | <i>Cx. pipiens</i>       | M      | 4      | -        |
| 212       | Salto      | Salto city 01              | CDC model 512 | December 10, 2010 | <i>Cx. pipiens</i>       | F      | 29     | No       |
| 213       | Salto      | Salto city 01              | CDC model 512 | December 10, 2010 | <i>Cx. pipiens</i>       | M      | 4      | -        |
| 214       | Salto      | Salto city 01              | CDC model 512 | December 10, 2010 | <i>Cx. pipiens</i>       | F      | 54     | No       |
| 215       | Soriano    | Mercedes city 01           | CDC model 512 | February 25, 2011 | <i>Cx. pipiens</i>       | F      | 14     | No       |
| 216       | Soriano    | Mercedes city 01           | CDC model 712 | February 25, 2011 | <i>Cx. pipiens</i>       | M      | 3      | -        |
| 217       | Soriano    | Mercedes city 01           | CDC model 712 | February 25, 2011 | <i>Cx. pipiens</i>       | F      | 4      | No       |
| 218       | Río Negro  | Arrayanes suburb           | CDC model 512 | February 26, 2011 | <i>Cx. pipiens</i>       | F      | 3      | No       |
| 219       | Río Negro  | Arrayanes suburb           | CDC model 712 | February 26, 2011 | <i>Cx. pipiens</i>       | F      | 15     | No       |
| 220       | Soriano    | Mercedes city 02           | CDC model 512 | February 26, 2011 | <i>Cx. pipiens</i>       | F      | 5      | No       |
| 221       | Soriano    | Mercedes city 01           | CDC model 512 | February 27, 2011 | <i>Cx. pipiens</i>       | M      | 1      | -        |
| 222       | Soriano    | Mercedes city 01           | CDC model 512 | February 27, 2011 | <i>Cx. pipiens</i>       | F      | 11     | No       |
| 223       | Soriano    | Mercedes city 01           | CDC model 712 | February 27, 2011 | <i>Cx. pipiens</i>       | M      | 1      | -        |
| 224       | Soriano    | Mercedes city 01           | CDC model 712 | February 27, 2011 | <i>Cx. pipiens</i>       | F      | 6      | No       |
| 225       | Colonia    | Colonia city center        | CDC model 512 | March 18, 2011    | <i>Ae. albifasciatus</i> | F      | 2      | No       |
| 226       | Colonia    | Colonia city center        | CDC model 512 | March 18, 2011    | <i>Cx. pipiens</i>       | F      | 17     | No       |
| 227       | Colonia    | Colonia city center        | CDC model 512 | March 18, 2011    | <i>P. ferox</i>          | F      | 3      | No       |
| 228       | Colonia    | Colonia (Los patos lagoon) | CDC model 512 | March 18, 2011    | <i>Cx. pipiens</i>       | F      | 52     | No       |
| 229       | Colonia    | Colonia (Los Patos Lagoon) | CDC model 512 | March 18, 2011    | <i>M. titillans</i>      | F      | 8      | No       |
| 230       | Colonia    | Colonia (Los Patos Lagoon) | CDC model 512 | March 18, 2011    | <i>M. titillans</i>      | M      | 1      | -        |
| 231       | Colonia    | Colonia (Los Patos Lagoon) | CDC model 512 | March 19, 2011    | <i>Cx. pipiens</i>       | F      | 19     | No       |
| 232       | Colonia    | Colonia (Los Patos Lagoon) | CDC model 512 | March 19, 2011    | <i>Cx. pipiens</i>       | F      | 17     | No       |
| 233       | Colonia    | Colonia (Los Patos Lagoon) | CDC model 512 | March 19, 2011    | <i>M. titillans</i>      | F      | 4      | No       |
| 234       | Colonia    | Colonia (Los Patos Lagoon) | CDC model 512 | March 19, 2011    | <i>Psorophora sp.</i>    | F      | 1      | No       |
| 235       | Colonia    | Colonia (Los Patos Lagoon) | CDC model 712 | March 19, 2011    | <i>Cx. pipiens</i>       | F      | 51     | No       |
| 236       | Colonia    | Colonia (Los Patos Lagoon) | CDC model 712 | March 19, 2011    | <i>Ae. albifasciatus</i> | F      | 1      | No       |
| 237       | Colonia    | Colonia (Los Patos Lagoon) | CDC model 712 | March 19, 2011    | <i>M. titillans</i>      | F      | 3      | No       |
| 238       | Colonia    | Colonia (Los Patos Lagoon) | CDC model 512 | March 19, 2011    | <i>Cx. pipiens</i>       | F      | 52     | No       |
| 239       | Colonia    | Colonia (Los Patos Lagoon) | CDC model 512 | March 19, 2011    | <i>M. titillans</i>      | F      | 8      | No       |
| 240       | Colonia    | Colonia (Los Patos Lagoon) | CDC model 512 | March 19, 2011    | <i>Ae. albifasciatus</i> | F      | 1      | No       |
| 241       | Salto      | Salto city 01              | CDC model 512 | April 15, 2011    | <i>Ae. aegypti</i>       | F      | 6      | No       |
| 242       | Salto      | Salto city 01              | CDC model 512 | April 15, 2011    | <i>Cx. pipiens</i>       | F      | 1      | No       |
| 243       | Salto      | Salto city 02              | CDC model 712 | April 15, 2011    | <i>Cx. pipiens</i>       | F      | 4      | No       |
| 244       | Salto      | Salto city 02              | CDC model 712 | April 15, 2011    | <i>Cx. pipiens</i>       | F      | 1      | Yes      |
| 245       | Salto      | Salto city 01              | CDC model 512 | April 16, 2011    | <i>Ae. aegypti</i>       | F      | 1      | No       |
| 246       | Salto      | Salto city 01              | CDC model 512 | April 16, 2011    | <i>Cx. pipiens</i>       | F      | 2      | No       |
| 247       | Salto      | Salto city 01              | CDC model 712 | April 16, 2011    | <i>Ae. aegypti</i>       | F      | 4      | No       |
| 248       | Salto      | Salto city 01              | CDC model 712 | April 16, 2011    | <i>Cx. pipiens</i>       | F      | 5      | No       |
| 249       | Montevideo | Belvedere neighborhood     | CDC model 712 | April 27, 2011    | <i>Cx. pipiens</i>       | F      | 1      | Yes      |
| 250       | Montevideo | Belvedere neighborhood     | CDC model 712 | April 27, 2011    | <i>Cx. pipiens</i>       | F      | 25     | No       |
| 251       | Montevideo | Belvedere neighborhood     | CDC model 712 | April 27, 2011    | <i>Cx. pipiens</i>       | F      | 51     | No       |
| 252       | Montevideo | Belvedere neighborhood     | CDC model 712 | April 27, 2011    | <i>Cx. pipiens</i>       | F      | 50     | No       |
| 253       | Montevideo | Belvedere neighborhood     | CDC model 712 | April 27, 2011    | <i>Cx. pipiens</i>       | F      | 30     | No       |
| 254       | Montevideo | Belvedere neighborhood     | CDC model 712 | April 27, 2011    | <i>Cx. pipiens</i>       | F      | 1      | Yes      |
| 255       | Montevideo | Colón neighborhood         | CDC model 512 | April 28, 2011    | <i>Cx. pipiens</i>       | F      | 30     | No       |
| 256       | Montevideo | Colón neighborhood         | CDC model 512 | April 28, 2011    | <i>Cx. pipiens</i>       | F      | 32     | No       |
| 257       | Montevideo | Colón neighborhood         | CDC model 712 | April 28, 2011    | <i>Cx. pipiens</i>       | F      | 2      | Yes      |
| 258       | Montevideo | Colón neighborhood         | CDC model 712 | April 28, 2011    | <i>Cx. pipiens</i>       | F      | 35     | No       |
| 259       | Montevideo | Colón neighborhood         | CDC model 712 | April 28, 2011    | <i>Cx. pipiens</i>       | M      | 1      | -        |
| 260       | Montevideo | Colón neighborhood         | CDC model 712 | April 28, 2011    | <i>Cx. pipiens</i>       | F      | 45     | No       |
| 261       | Montevideo | Colón neighborhood         | CDC model 712 | April 28, 2011    | <i>Cx. pipiens</i>       | F      | 48     | No       |
| 262       | Canelones  | Las Toscas locality        | CDC model 712 | November 5, 2014  | <i>Ae. aegypti</i>       | M      | 1      | ND       |
| 263       | Canelones  | Las Toscas locality        | CDC model 712 | November 5, 2014  | <i>Cx. pipiens</i>       | M      | 1      | ND       |
| 264       | Canelones  | Las Toscas locality        | CDC model 712 | November 5, 2014  | <i>Cx. pipiens</i>       | F      | 19     | ND       |
| 265       | Canelones  | Las Toscas locality        | CDC model 712 | November 5, 2014  | <i>Cx. pipiens</i>       | F      | 20     | ND       |
| 266       | Canelones  | Las Toscas locality        | CDC model 712 | November 5, 2014  | <i>Cx. pipiens</i>       | F      | 20     | ND       |
| 267       | Canelones  | Las Toscas locality        | CDC model 712 | November 5, 2014  | <i>Cx. pipiens</i>       | F      | 1      | ND       |

3,575

\* Pool 17 does not exist.
